# Supplementary material for: A systematic identification and analysis of scientists on Twitter
Source: PubMed Central journal article supplement (PMC5388341; doi:10.1371/journal.pone.0175368), 2017-04-11
Supplement: pone.0175368.s002.pdf [file pone.0175368.s002.pdf]

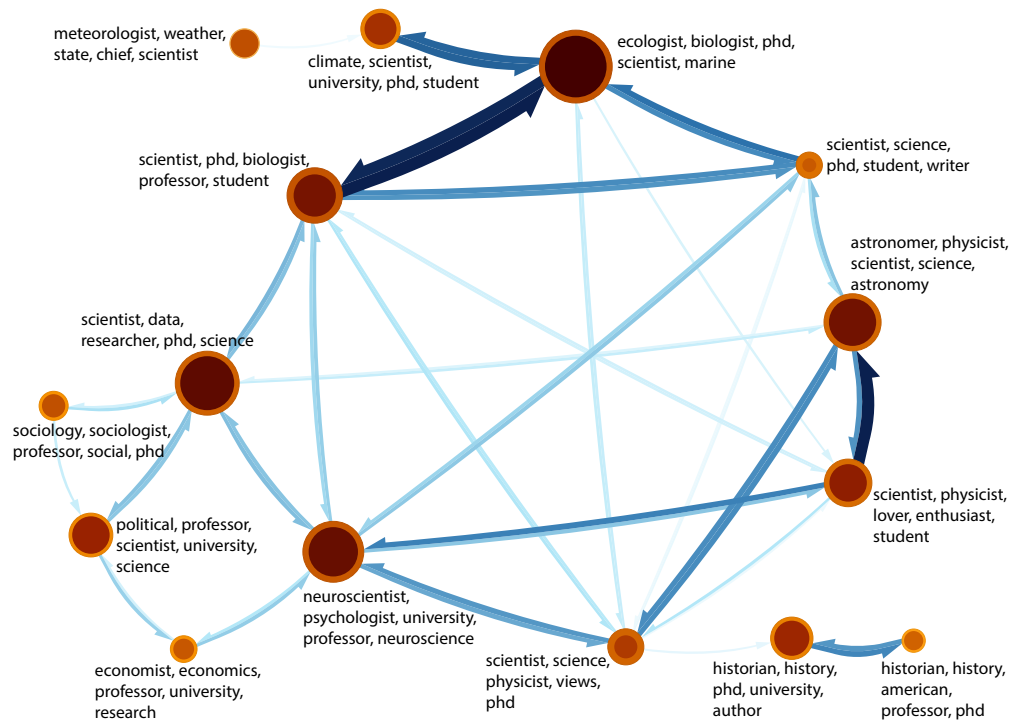

Fig S1. Network of communities.
