# Supplementary material for: A systematic identification and analysis of scientists on Twitter
Source: PubMed Central journal article supplement (PMC5388341; doi:10.1371/journal.pone.0175368), 2017-04-11
Supplement: pone.0175368.s003.pdf [file pone.0175368.s003.pdf]

**Table S1. Scientist occupations from 2010 Standard Occupational Classification released by US Department of Labor.**

| 15-1100 Computer Occupations                  |                                                |
|-----------------------------------------------|------------------------------------------------|
| 15-1111                                       | Computer and Information Research Scientists   |
| 15-2000 Mathematical Science Occupations      |                                                |
| 15-2021                                       | Mathematicians                                 |
| 15-2041                                       | Statisticians                                  |
| 19-1000 Life Scientists                       |                                                |
| 19-1011                                       | Animal Scientists                              |
| 19-1012                                       | Food Scientists                                |
| 19-1013                                       | Soil and Plant Scientists                      |
| 19-1021                                       | Biochemists and Biophysicists                  |
| 19-1022                                       | Microbiologists                                |
| 19-1023                                       | Zoologists and Wildlife Biologists             |
| 19-1031                                       | Conservation Scientists                        |
| 19-1041                                       | Epidemiologists                                |
| 19-1042                                       | Medical Scientists                             |
| 19-2000 Physical Scientists                   |                                                |
| 19-2011                                       | Astronomers                                    |
| 19-2012                                       | Physicists                                     |
| 19-2021                                       | Atmospheric and Space Scientists               |
| 19-2031                                       | Chemists                                       |
| 19-2032                                       | Materials Scientists                           |
| 19-2041                                       | Environmental Scientists                       |
| 19-2042                                       | Geoscientists                                  |
| 19-2043                                       | Hydrologists                                   |
| 19-3000 Social Scientists and Related Workers |                                                |
| 19-3011                                       | Economists                                     |
| 19-3031                                       | Clinical, Counseling, and School Psychologists |
| 19-3032                                       | Industrial-Organizational Psychologists        |
| 19-3041                                       | Sociologists                                   |
| 19-3091                                       | Anthropologists and Archeologists              |
| 19-3092                                       | Geographers                                    |
| 19-3093                                       | Historians                                     |
| 19-3094                                       | Political Scientists                           |
