# Supplementary material for: A systematic identification and analysis of scientists on Twitter
Source: PubMed Central journal article supplement (PMC5388341; doi:10.1371/journal.pone.0175368), 2017-04-11
Supplement: pone.0175368.s004.pdf [file pone.0175368.s004.pdf]

**Table S2. Top scientist titles from profile descriptions.**

| Discipline            | Users | Discipline              | Users |
|-----------------------|-------|-------------------------|-------|
| Psychologist          | 3379  | Sociologist             | 538   |
| Historian             | 2826  | Astronomer              | 463   |
| Physicist             | 2561  | Social scientist        | 343   |
| Nutritionist          | 2468  | Mathematician           | 333   |
| Computer scientist    | 1089  | Linguist                | 320   |
| Archaeologist         | 919   | Geographer              | 319   |
| Political scientist   | 891   | Epidemiologist          | 294   |
| Biologist             | 866   | Genealogist             | 254   |
| Meteorologist         | 818   | Geologist               | 253   |
| Ecologist             | 698   | Chemist                 | 242   |
| Neuroscientist        | 665   | Astrophysicist          | 236   |
| Economist             | 661   | Microbiologist          | 214   |
| Statistician          | 599   | Environmental scientist | 208   |
| Clinical psychologist | 576   | Evolutionary biologist  | 194   |
| Anthropologist        | 546   | Pathologist             | 177   |
