# Supplementary material for: A systematic identification and analysis of scientists on Twitter
Source: PubMed Central journal article supplement (PMC5388341; doi:10.1371/journal.pone.0175368), 2017-04-11
Supplement: pone.0175368.s005.pdf [file pone.0175368.s005.pdf]

**Table S3. Top scientist titles from Twitter list names.**

| Discipline          | Users | Discipline             | Users |
|---------------------|-------|------------------------|-------|
| Psychologist        | 4663  | Epidemiologist         | 387   |
| Historian           | 3371  | Geographer             | 357   |
| Physicist           | 2859  | Geologist              | 344   |
| Nutritionist        | 2510  | Evolutionary biologist | 336   |
| Archaeologist       | 1183  | Genealogist            | 298   |
| Sociologist         | 996   | Social scientist       | 281   |
| Economist           | 955   | Ecologist              | 193   |
| Biologist           | 889   | Geoscientist           | 188   |
| Meteorologist       | 824   | Social psychologist    | 181   |
| Astronomer          | 768   | Pathologist            | 172   |
| Political scientist | 756   | Astrophysicist         | 159   |
| Anthropologist      | 629   | Mathematician          | 148   |
| Statistician        | 594   | Microbiologist         | 143   |
| Neuroscientist      | 571   | Entomologist           | 126   |
| Linguist            | 476   | Chemist                | 121   |
