# Supplementary material for: A systematic identification and analysis of scientists on Twitter
Source: PubMed Central journal article supplement (PMC5388341; doi:10.1371/journal.pone.0175368), 2017-04-11
Supplement: pone.0175368.s006.pdf [file pone.0175368.s006.pdf]

**Table S4. Top scientists in the follower, retweet, and mention networks between scientists by in-degree  $d_{\leftarrow}$  or in-strength  $s_{\leftarrow}$ , PageRank ( $PR$ ), and  $k$ -core number.**

|                  |                                                                         |
|------------------|-------------------------------------------------------------------------|
| $d_{\leftarrow}$ | neiltyson, RichardDawkins, sapinker, phylogenomics, donttrythis         |
| $PR$             | neiltyson, RichardDawkins, sapinker, SamHarrisOrg, paulbloomatyale      |
| $k$              | randal_olson, Write4Research, zacharyapte, abcsoka, ballenamar          |
| $s_{\leftarrow}$ | neiltyson, AstroKatie, elakdawalla, phylogenomics, WhySharksMatter      |
| $PR$             | neiltyson, AstroKatie, conradhackett, RichardDawkins, elakdawalla       |
| $k$              | phylogenomics, surt_lab, duffy_ma, SciBry, ethanwhite                   |
| $s_{\leftarrow}$ | neiltyson, phylogenomics, RichardDawkins, WhySharksMatter, AtheneDonald |
| $PR$             | neiltyson, RichardDawkins, sapinker, elakdawalla, phylogenomics         |
| $k$              | raulpacheco, CMBuddle, mocost, imascientist, davenuss79                 |
