# Supplementary material for: A systematic identification and analysis of scientists on Twitter
Source: PubMed Central journal article supplement (PMC5388341; doi:10.1371/journal.pone.0175368), 2017-04-11
Supplement: pone.0175368.s007.pdf [file pone.0175368.s007.pdf]

**Table S5. Top users in each community.**

|    | Top users                                    |
|----|----------------------------------------------|
| 1  | JacquelynGill, GlobalEcoGuy, SylviaEarle     |
| 2  | zephoria, EdwardTufte, hmason                |
| 3  | paulbloomatyale, danariely, deevybee         |
| 4  | elakdawalla, seanmcarroll, AstroKatie        |
| 5  | phylogenomics, EricTopol, JCVenter           |
| 6  | neiltyson, RichardDawkins, sapinker          |
| 7  | kinggary, FukuyamaFrancis, BrendanNyhan      |
| 8  | holland_tom, JamesThorne2, EZuelow           |
| 9  | MichaelEMann, KHayhoe, ClimateOfGavin        |
| 10 | jimalkhalili, DrAliceRoberts, RogerHighfield |
| 11 | JimCantore, DrShepherd2013, reedtimmerTVN    |
| 12 | conradhackett, alondra, lisawade             |
| 13 | TimHarford, R.Thaler, CassSunstein           |
| 14 | deborahblum, kejames, KateClancy             |
| 15 | wcronon, TomSugrue, samueljredman            |
